# Supplementary material for: Inhibition of ErbB kinase signalling promotes resolution of neutrophilic inflammation
Source: eLife journal article supplement (doi:10.7554/elife.50990), 2019-10-15
Supplement: supp [file elife-50990-supp-v1.zip]

Archive with 5 entries (5 files):
- elife_poa_e50990_Figure_1_figure_supplement_1.pdf
- elife_poa_e50990_Transparent_Reporting_File.docx
- elife_poa_e50990_Figure_2_figure_supplement_1.pdf
- elife_poa_e50990_Figure_1_figure_supplement_2.pdf
- elife_poa_e50990_Supplementary_file_1.docx
