# Supplementary figures and images for: Inhibition of ErbB kinase signalling promotes resolution of neutrophilic inflammation
Source: eLife journal article supplement (doi:10.7554/elife.50990), 2019-10-15

Figure 1 - figure supplement 1

A

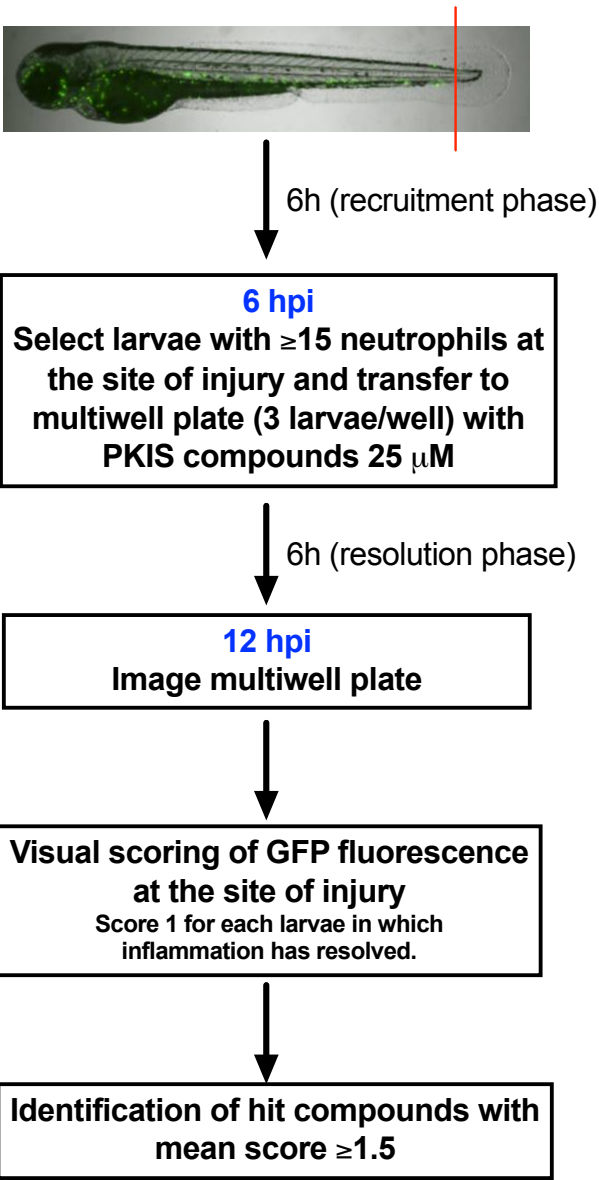

B

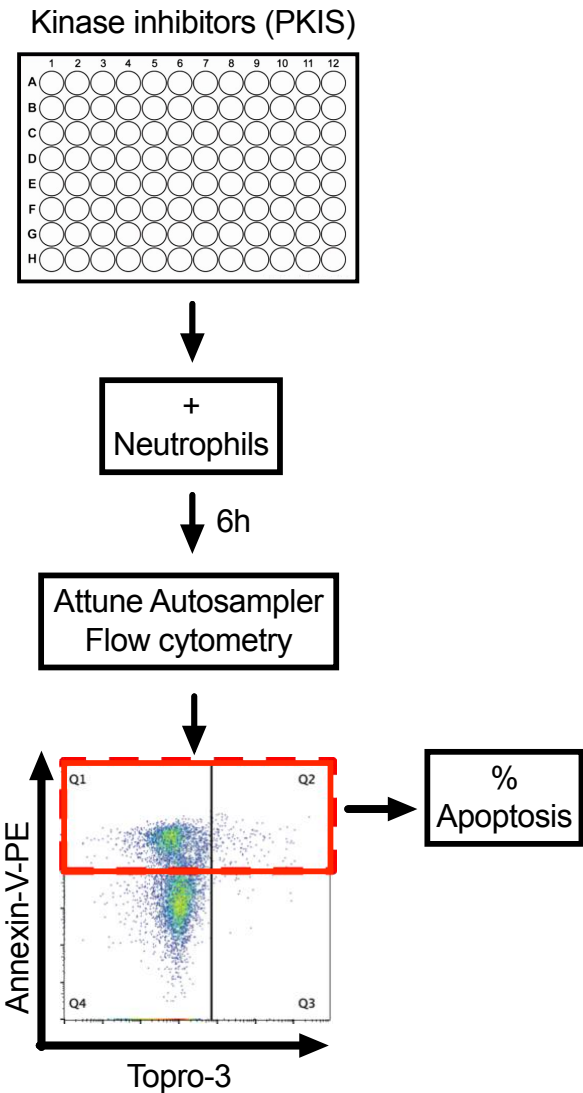

Supplement: supp [file elife-50990-supp-v1.zip › elife_poa_e50990_Figure_1_figure_supplement_1.pdf]

Figure 2 - figure supplement 1

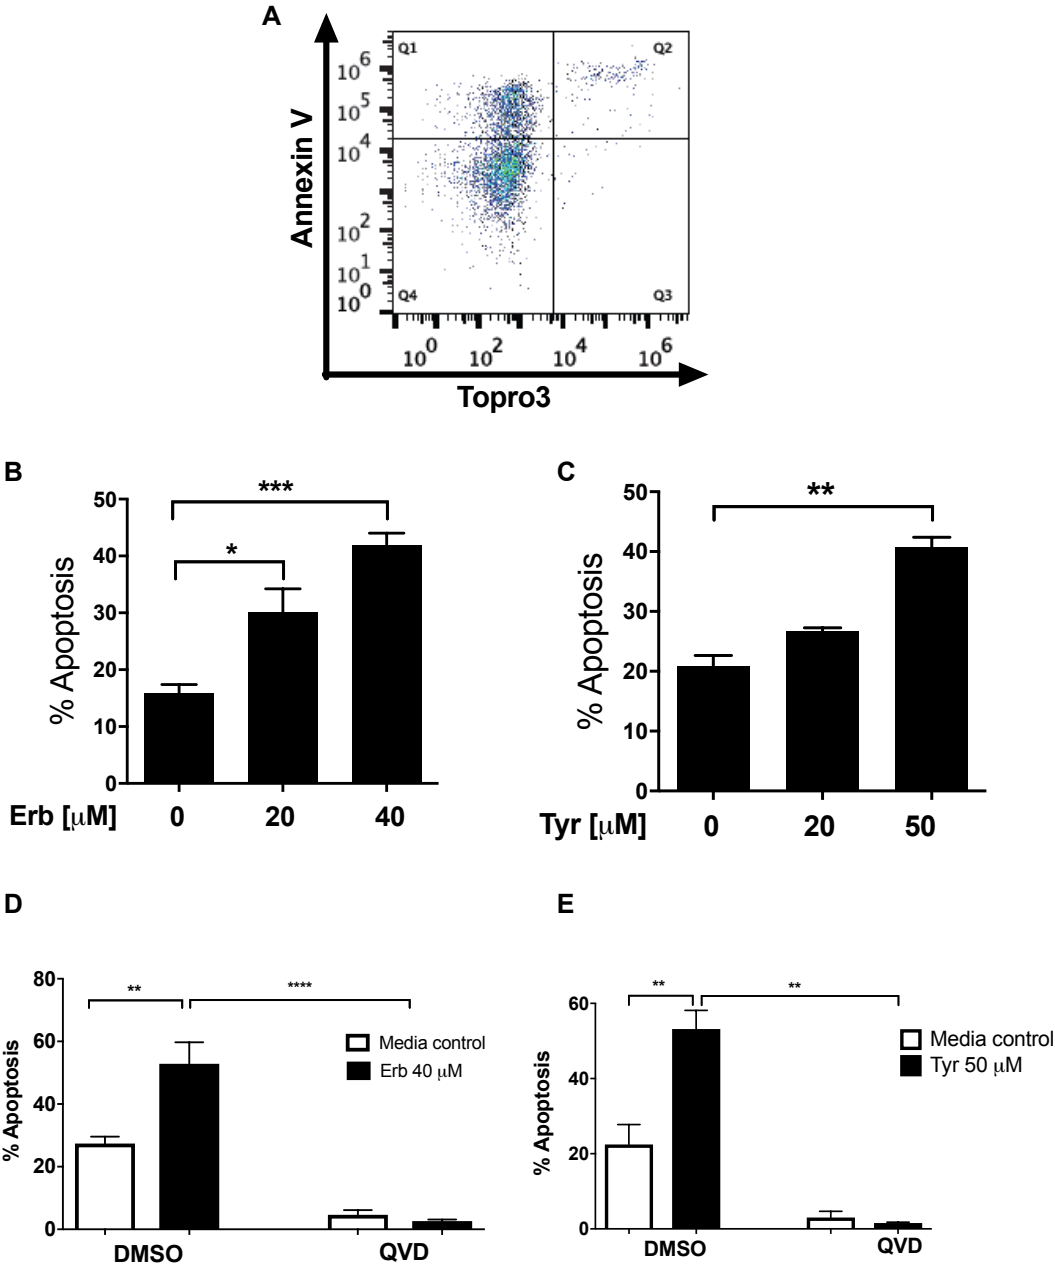

Supplement: supp [file elife-50990-supp-v1.zip › elife_poa_e50990_Figure_2_figure_supplement_1.pdf]

Figure 1 - figure supplement 2

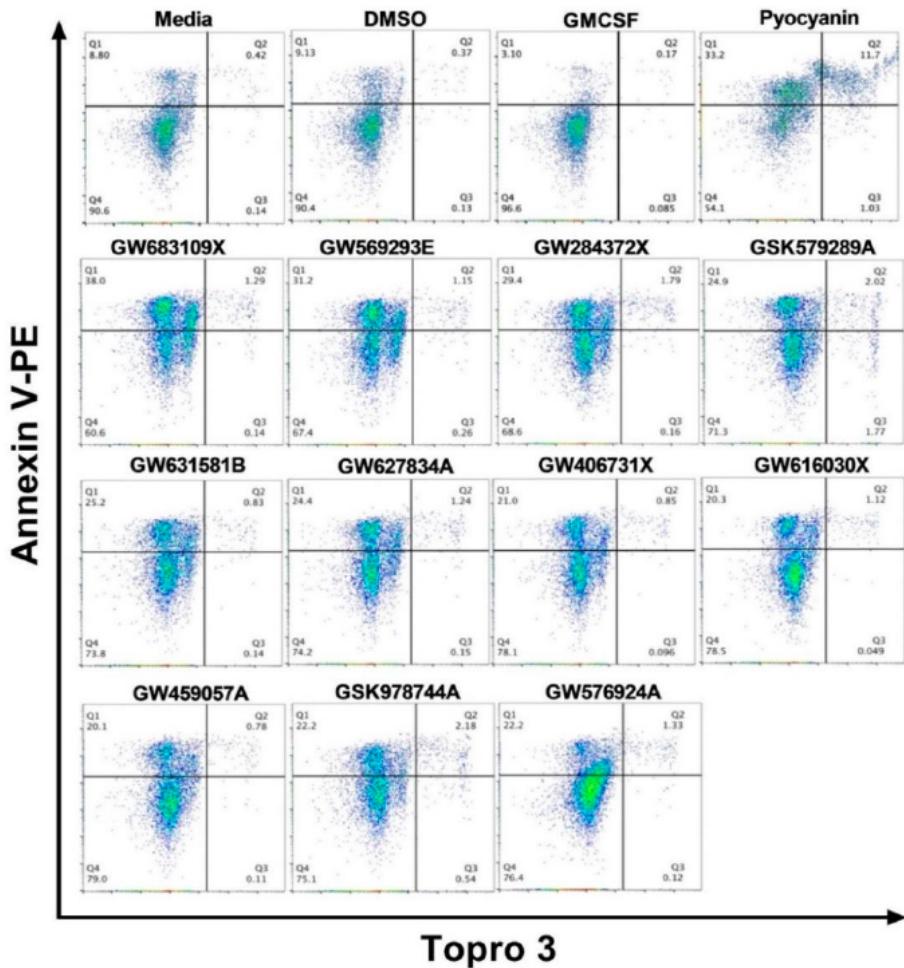

Supplement: supp [file elife-50990-supp-v1.zip › elife_poa_e50990_Figure_1_figure_supplement_2.pdf]
